# Supplementary material
Source: PubMed Central journal article supplement (PMC4631125)

**Supplemental Figure 1:** HPLC fingerprint for FAHF-2 showing structure of compounds found in the major peaks.

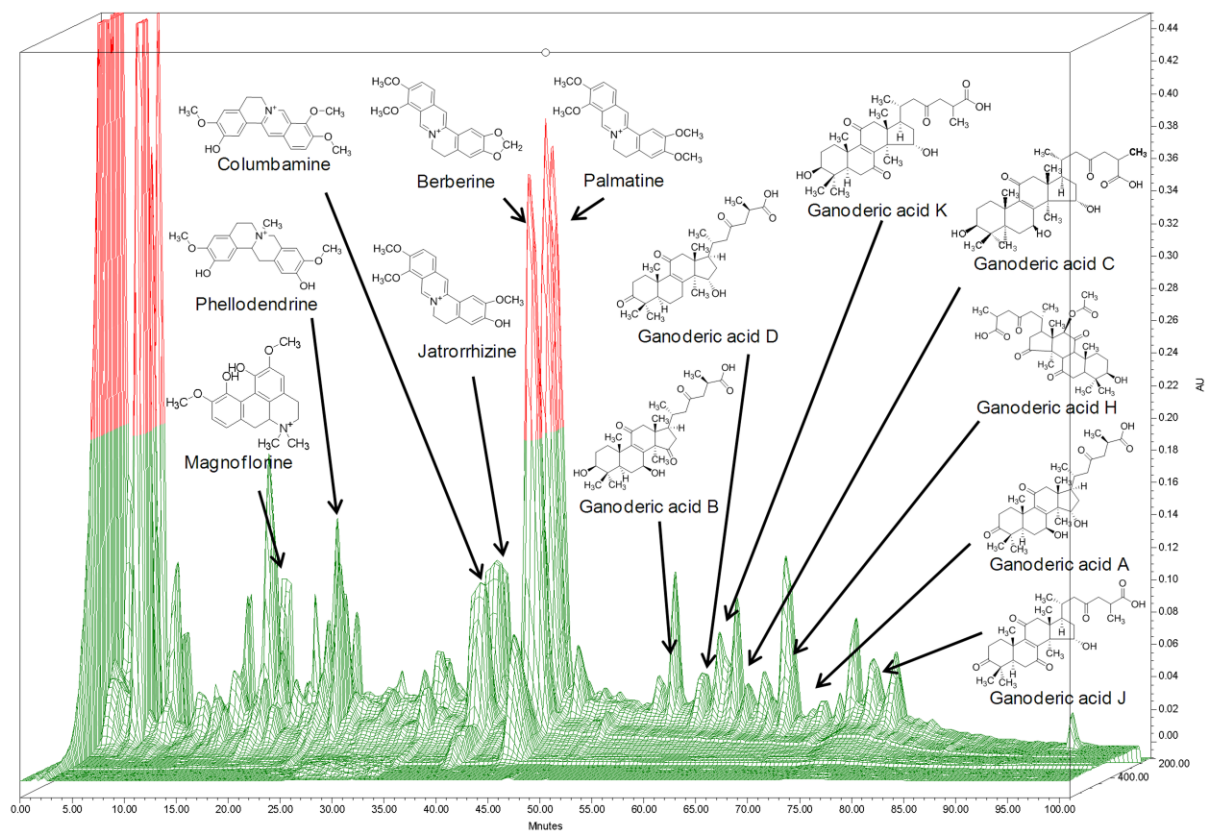

Supplement: NIHMS606270-supplement-supplemental_data_1.pdf [file NIHMS606270-supplement-supplemental_data_1.pdf]
