# Supplementary material
Source: PubMed Central journal article supplement (PMC4631125)

**Supplemental Figure 2:** The effect of FAHF-2 on TNF- $\alpha$  secretion and the NF- $\kappa$ B pathway

from RAW264.7 cells. A. Representative western blot for I $\kappa$ B, phospho-I $\kappa$ B, and beta actin. B.

Percent of I $\kappa$ B protein after LPS stimulation without FAHF-2 treatment (LPS) and with FAHF-2

treatment (FAHF-2), as compared with medium alone and FAHF-2 alone. C. The percent of

phosphorylated I $\kappa$ B after LPS stimulation and with FAHF-2 treatment as compared to LPS

stimulation and medium alone and FAHF-2 alone. All values normalized to beta actin.

\*\*\*p<0.001

A

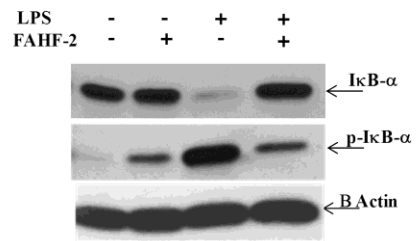

B

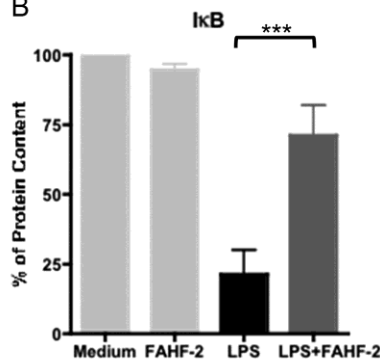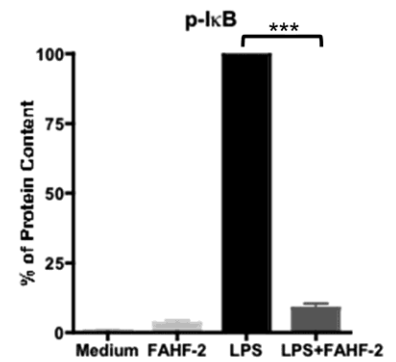

Supplement: NIHMS606270-supplement-supplemental_data_2.pdf [file NIHMS606270-supplement-supplemental_data_2.pdf]
